# Supplementary material for: No Robust Evidence of Future Changes in Major StratosphericSudden Warmings: A Multi-model Assessment from CCMI
Source: Copernicus journal article supplement (doi:10.5194/acp-2018-296), 2018-03-26
Supplement: Supplementary file 1 [file acp-2018-296-supplement.pdf]

## Supplementary material

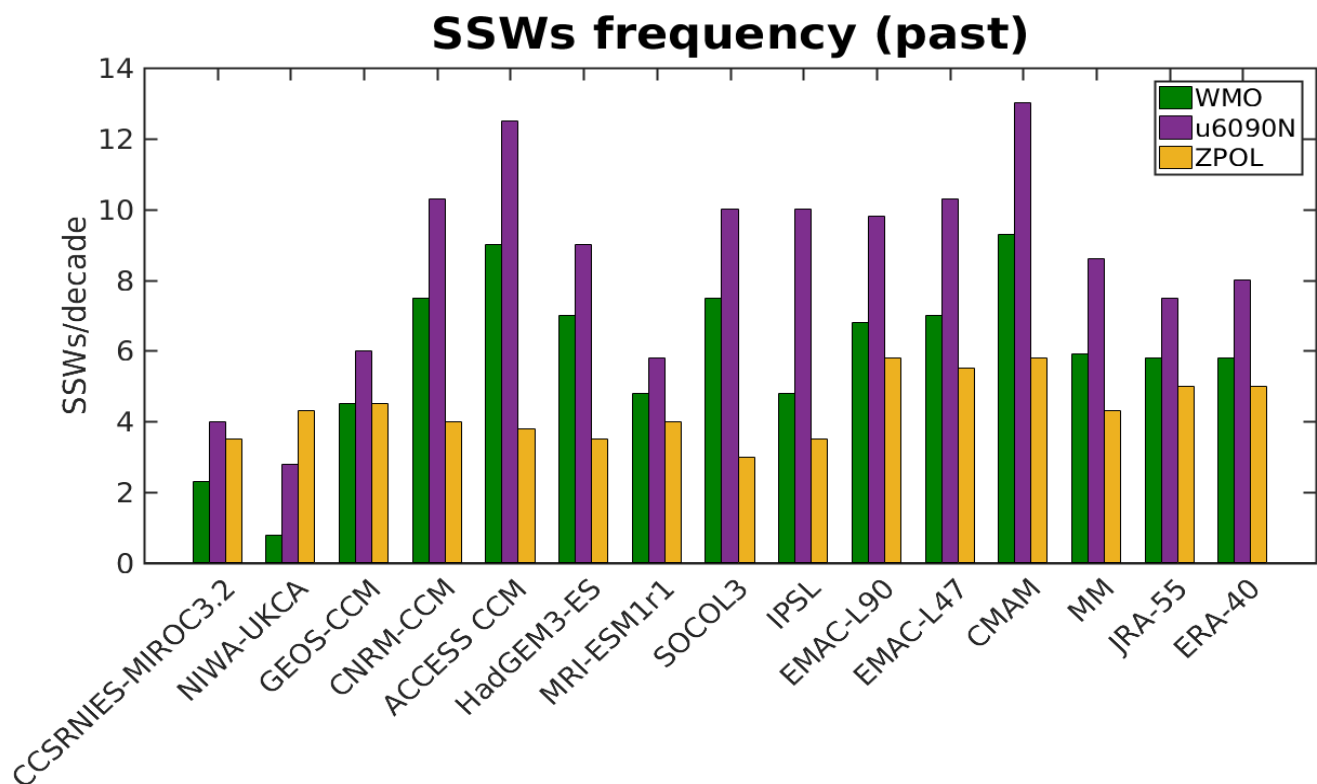

- 5 Figure S1. Mean frequency of major stratospheric warmings per decade identified with the WMO (green), u6090N (purple) and ZPOL (yellow) criteria in all models, the multimodel mean (MM), JRA-55 and ERA-40 in the past period.

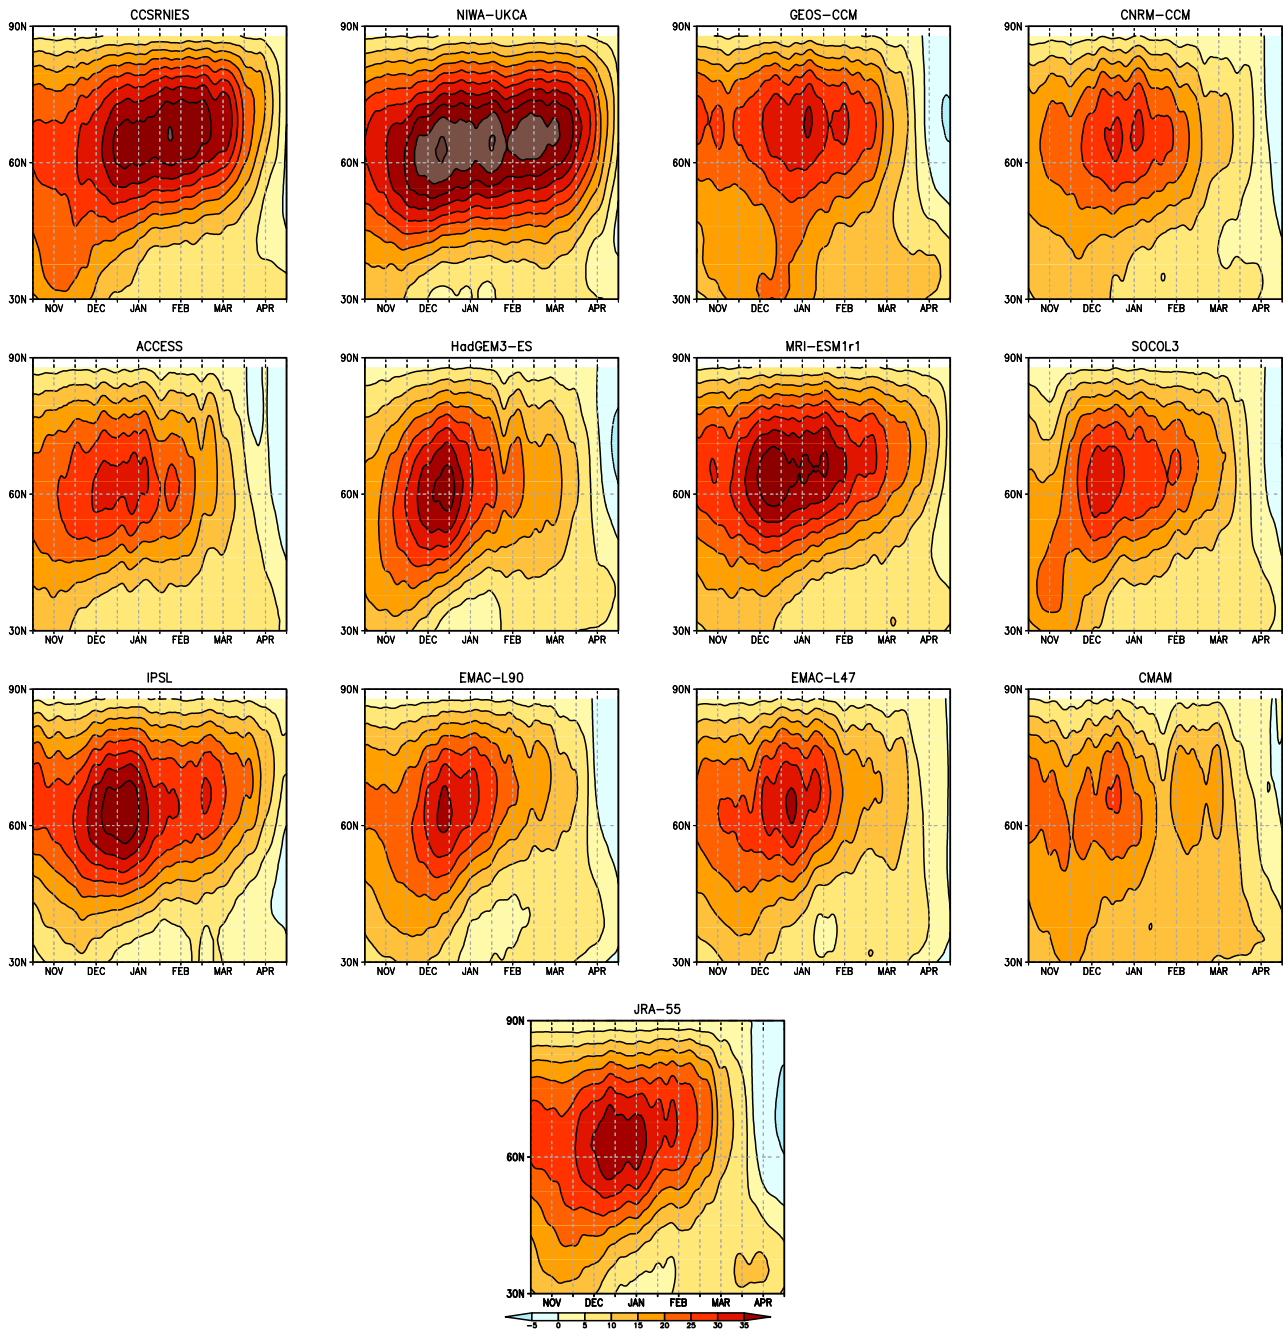

**Figure S2. Climatology of 5-day running mean of zonal mean zonal wind at 10 hPa in the past period (1960/61-1999/2000). Shading interval:  $5 \text{ m s}^{-1}$ .**

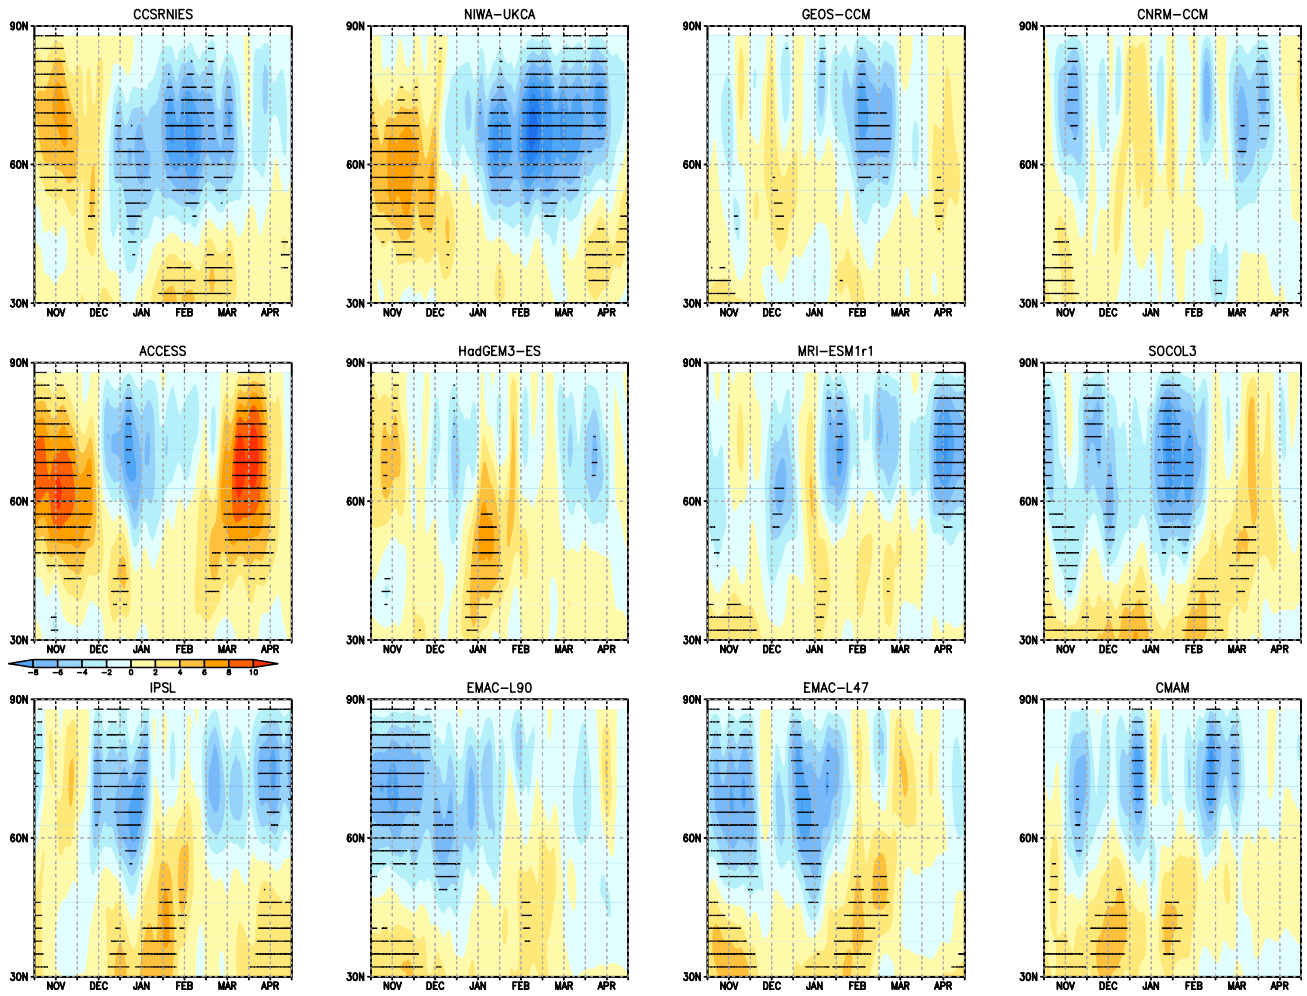

Figure S3. Future-minus-past differences in the climatology of 5-day running mean of zonal mean zonal wind at 10hPa. Shading interval:  $2 \text{ m s}^{-1}$ . Dots indicate statistically significant differences at a 95% confidence level.
